# Supplementary material for: The Michael addition reaction of Meldrum's acid (MA): an effective route for the preparation of reactive precursors for MA-based thermosetting resins
Source: Royal Society of Chemistry journal article supplement (doi:10.1039/c8py01643g), 2019-01-01
Supplement: c8py01643g1.pdf [file c8py01643g1.pdf]

## Electronic supplementary information (ESI)

### **Michael addition reaction of Meldrum's acid (MA): an effective route for preparation of reactive precursors for MA-based thermosetting resins**

Chien-Ho Huang and Ying-Ling Liu\*

Department of Chemical Engineering, National Tsing Hua University,

No. 101, Sec. 2, Kuang-Fu Road, Hsinchu, 30013, Taiwan.

\*E-mail: [liuyl@mx.nthu.edu.tw](mailto:liuyl@mx.nthu.edu.tw)

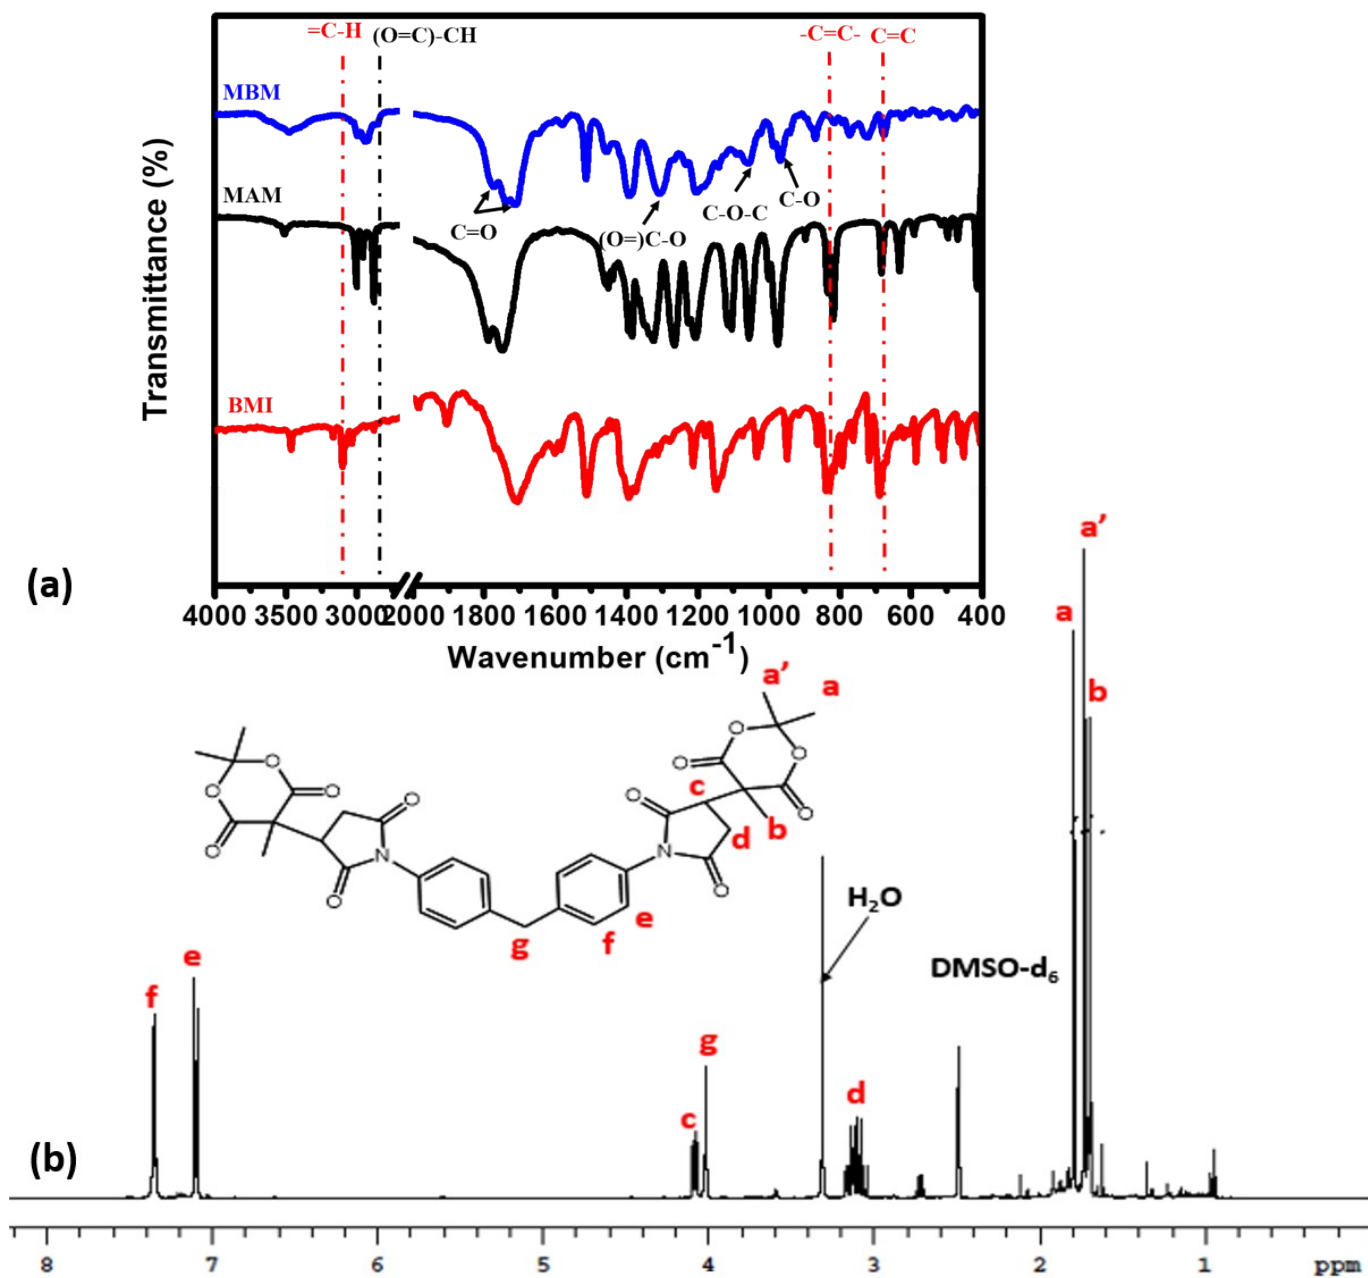

Figure S1. Spectral characterization of 2MA with (a) FTIR and (b)  $^1\text{H}$  NMR

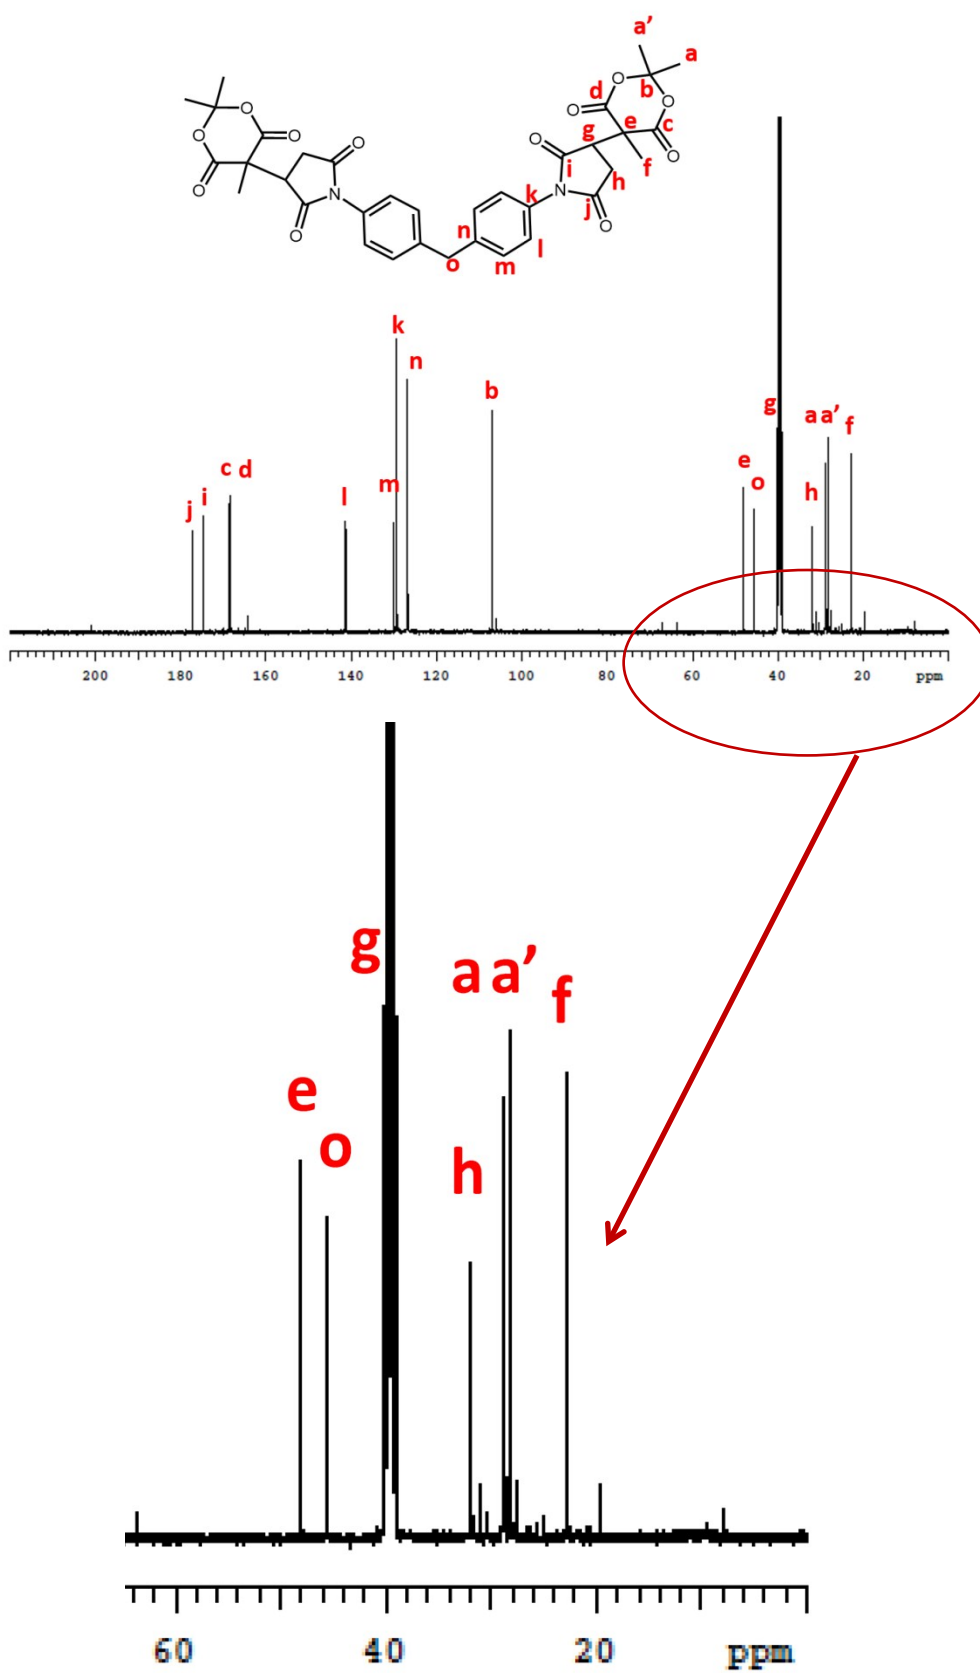

Figure S2.  $^{13}\text{C}$ -NMR spectral characterization of 2MA.

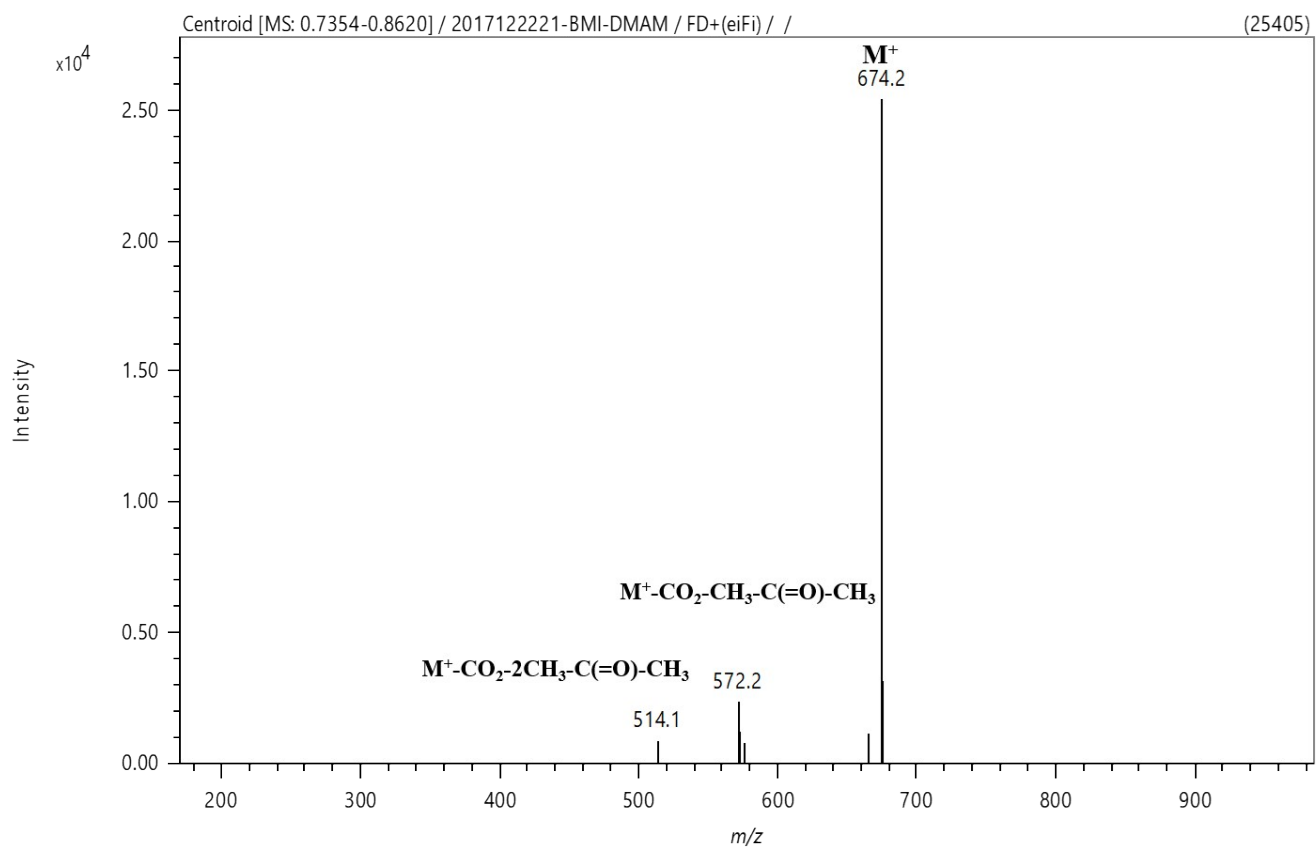

**Figure S3. Low Resolution Field Desorption Mass spectra of 2MA**

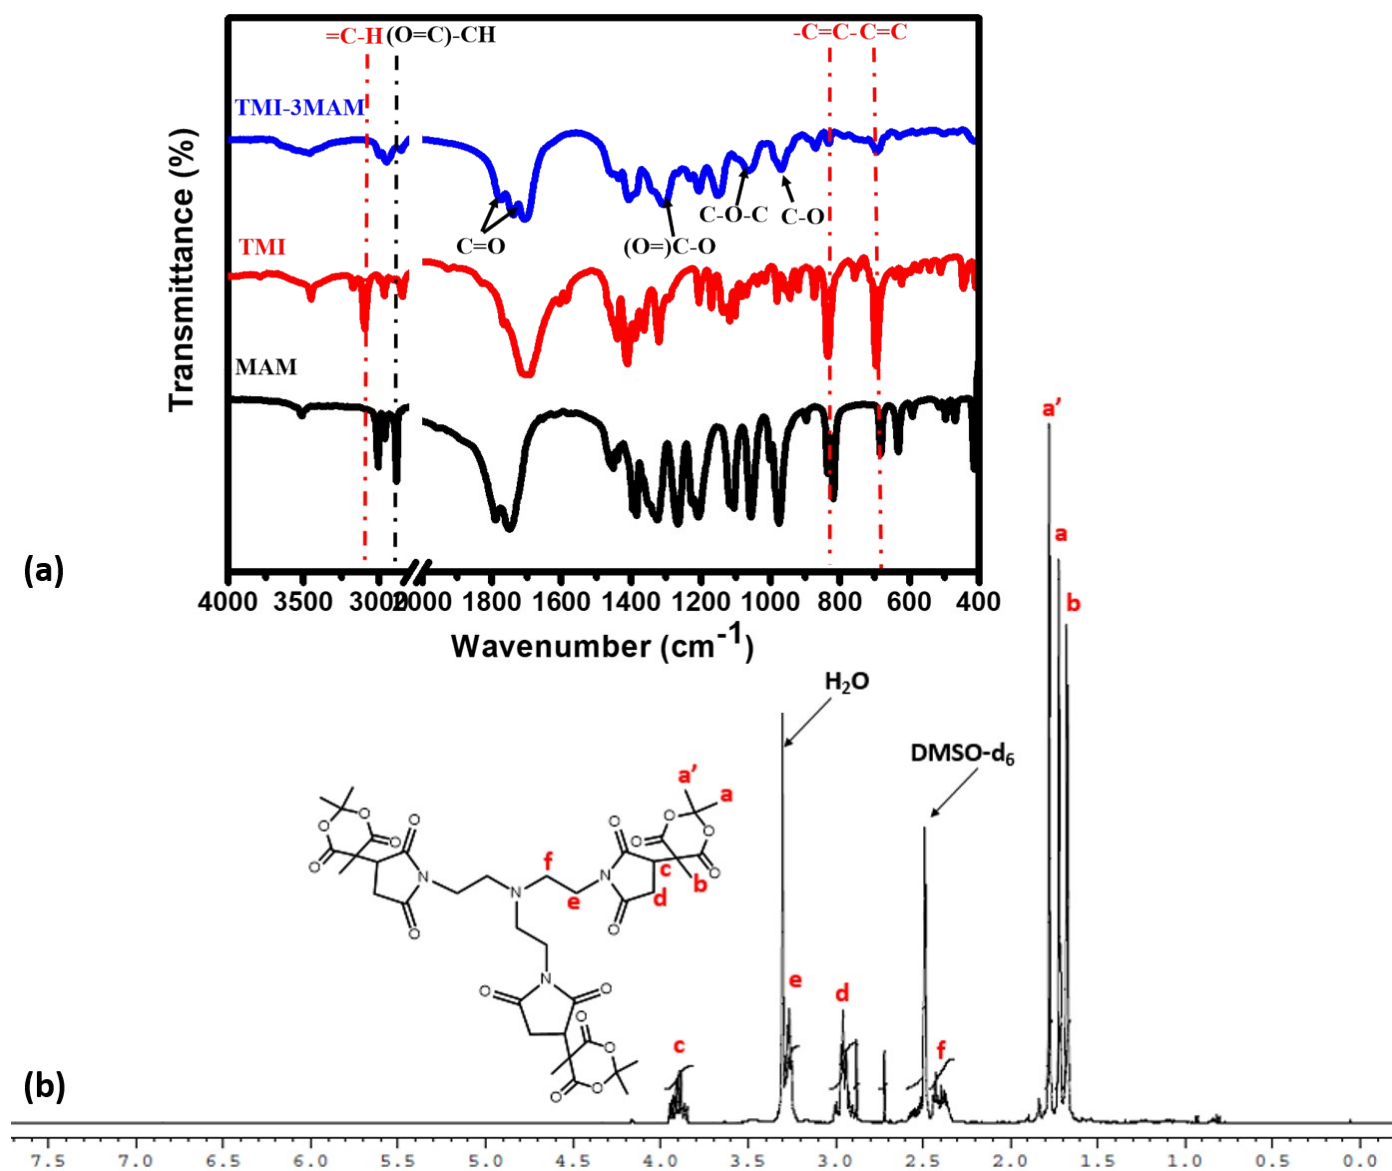

Figure S4. Spectral characterization of 3MA with (a) FTIR and (b)  $^1\text{H}$  NMR.

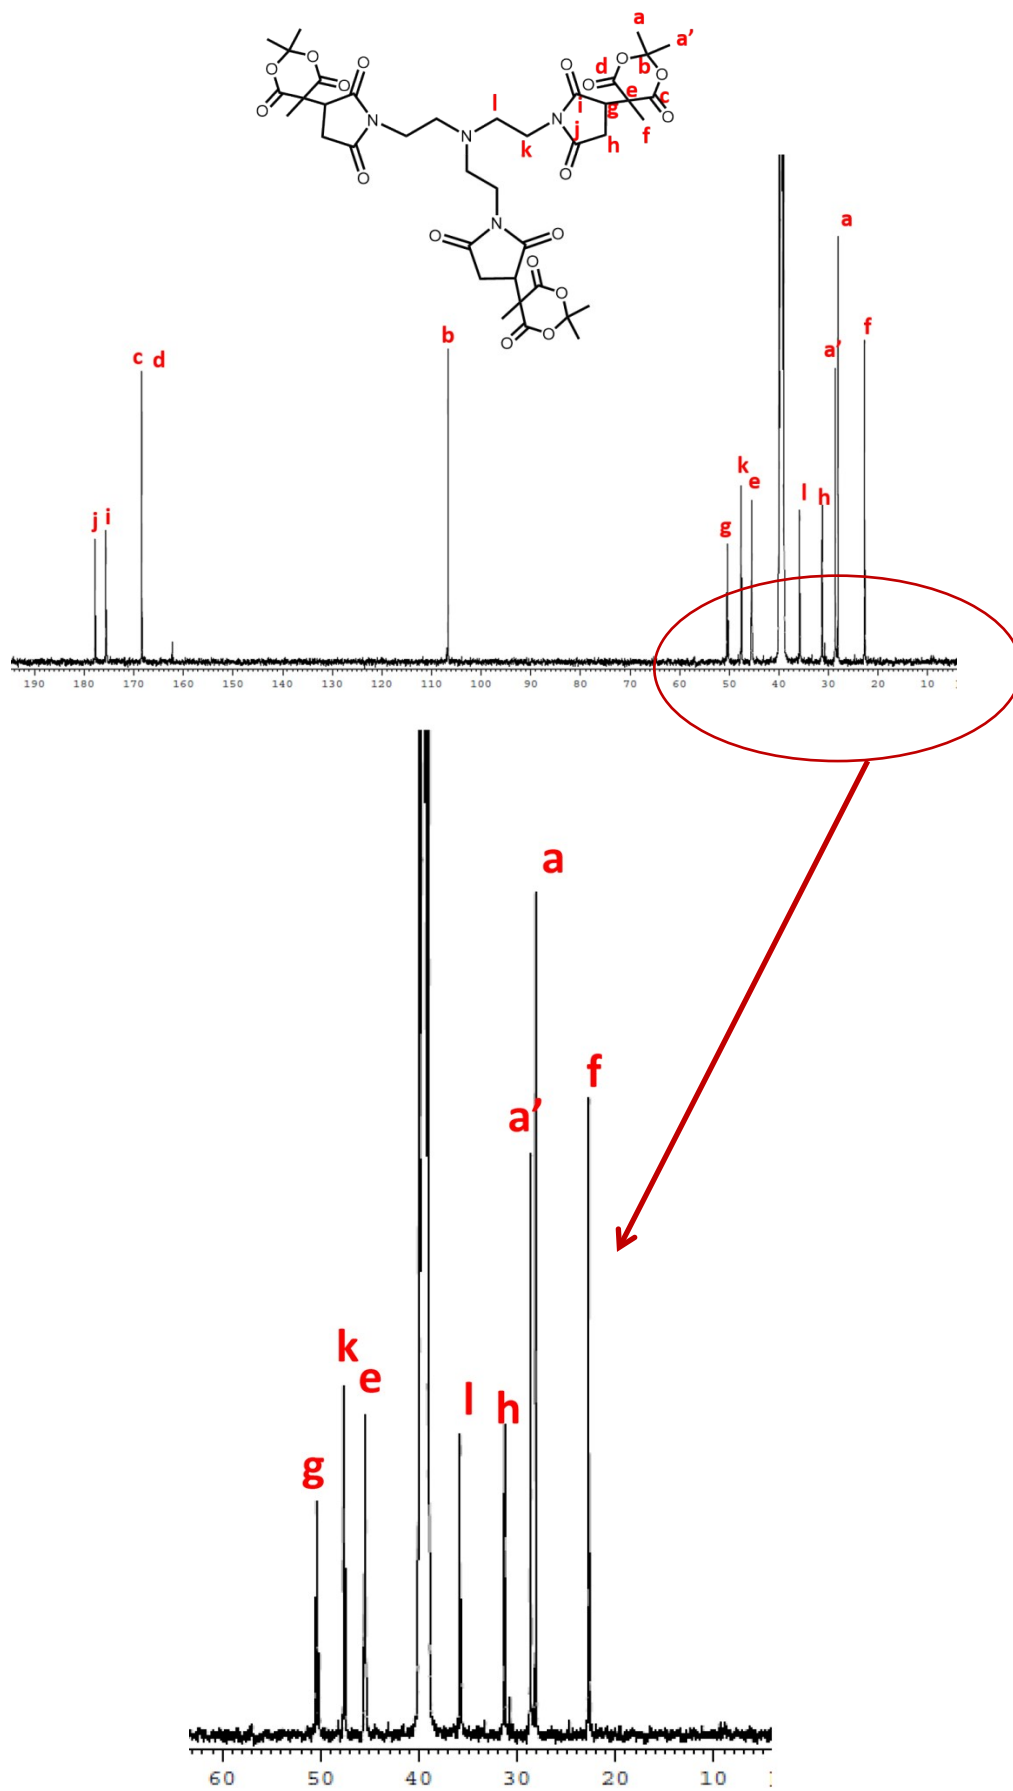

Figure S5.  $^{13}\text{C}$ -NMR spectral characterization of 3MA.

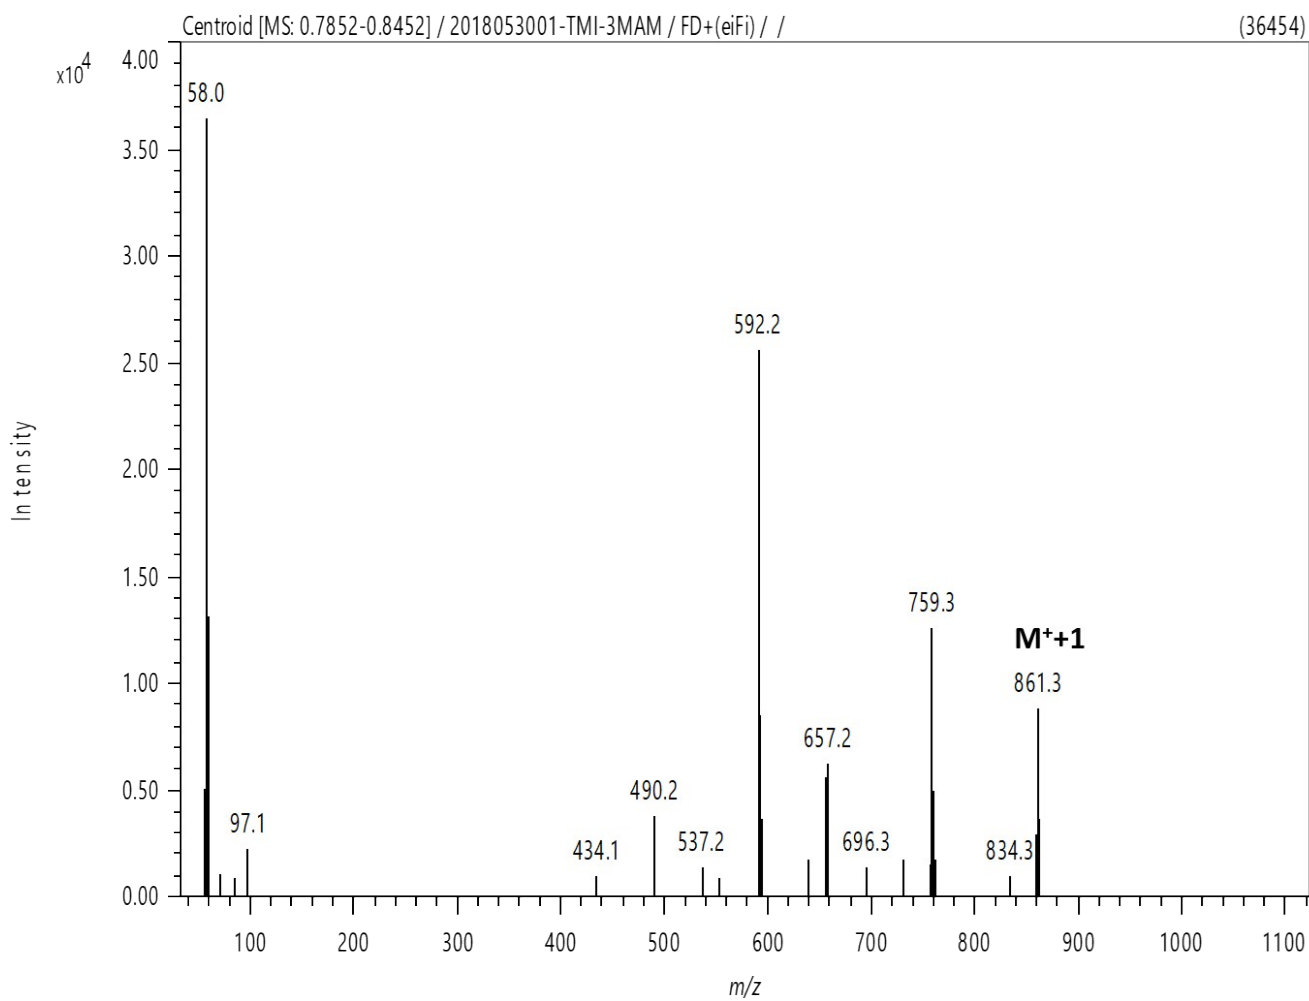

**Figure S6. Low Resolution Field Desorption Mass spectra of 3MA.**

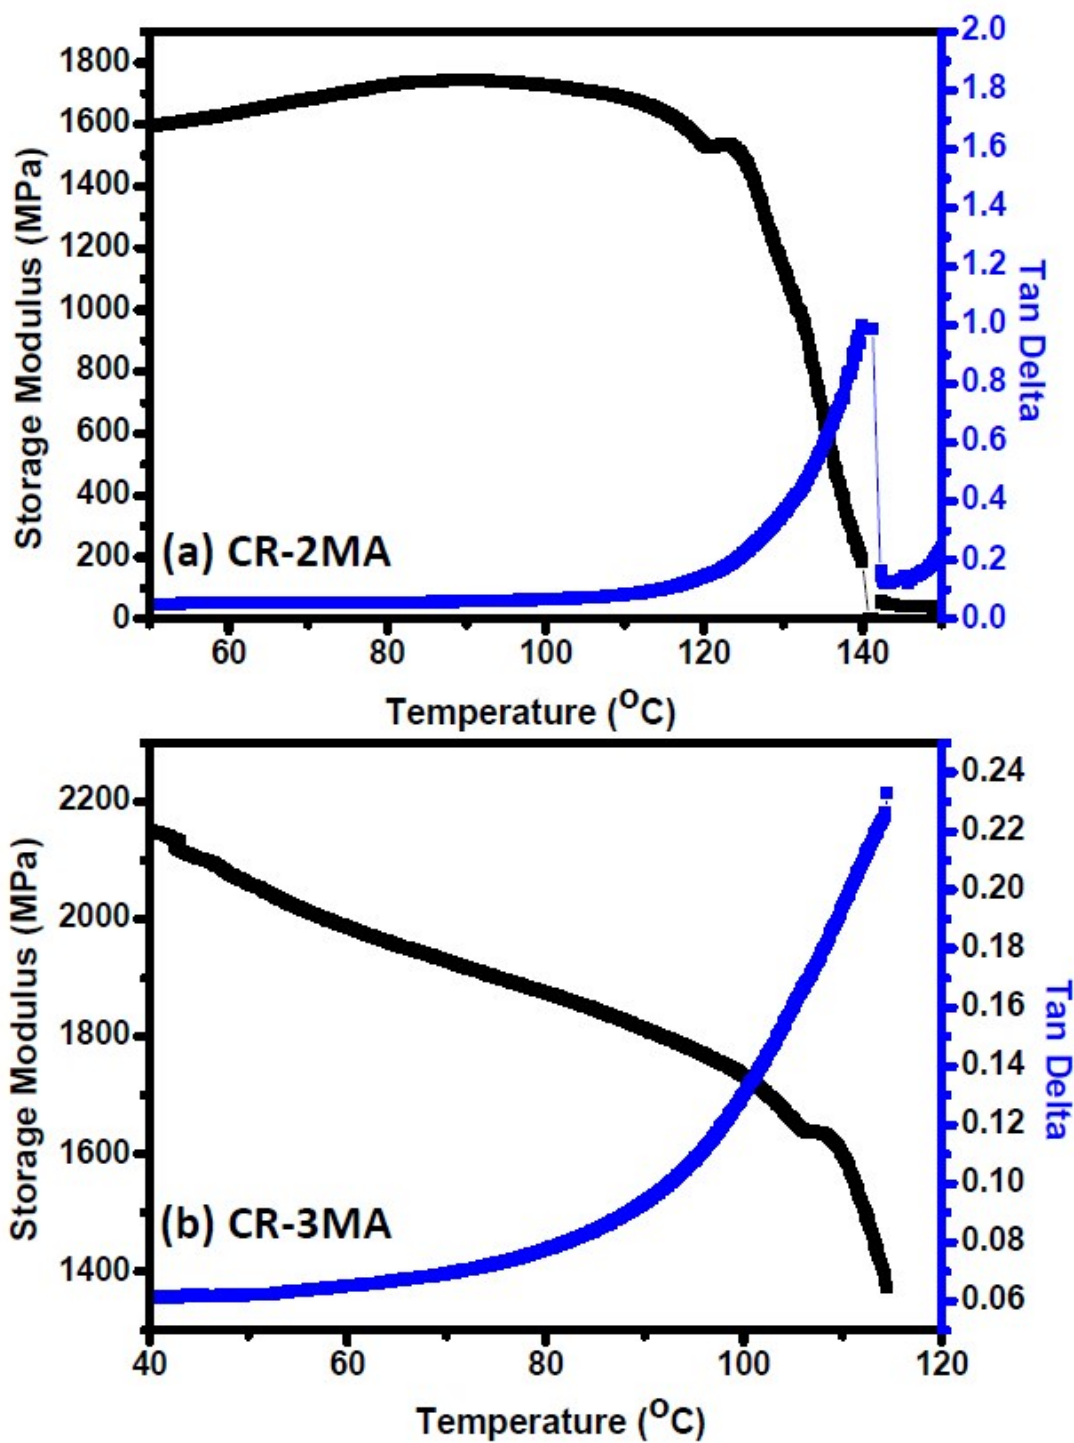

Figure S7 DMA thermograms of thermally cured sample of (a) 2MA (CR-2MA) and (b) 3MA (CR-3MA).



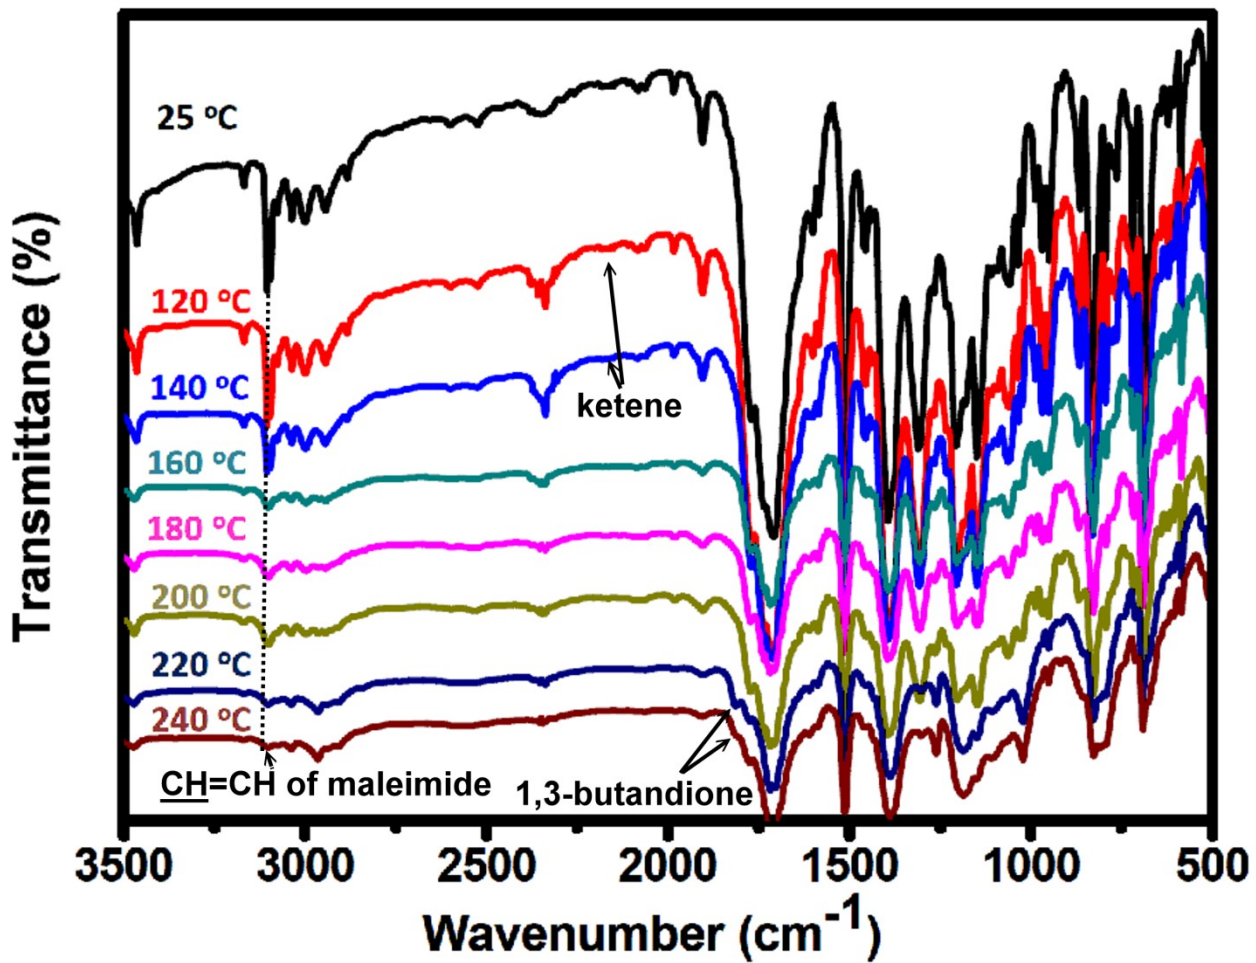

Figure S8 FTIR spectra of a BMI/2MA mixture (weight: 50/50) recorded at different temperatures.

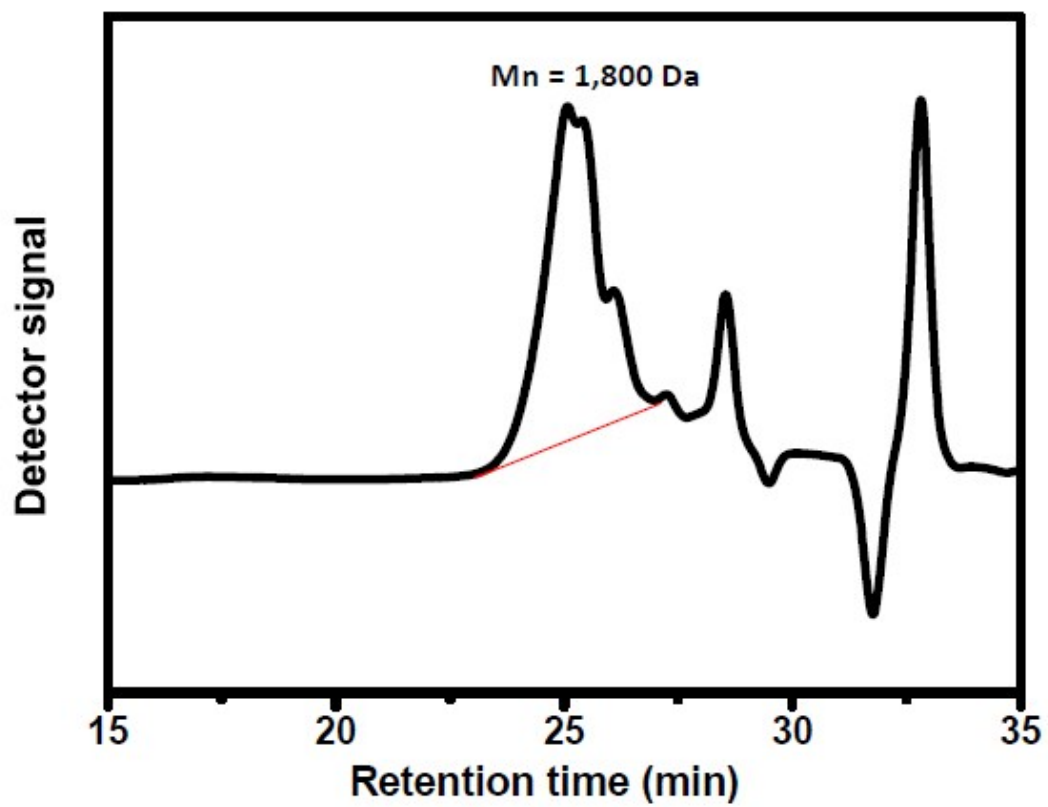

*Figure S9 GPC chromatogram of poly(BMI-MA).*
